# Supplementary material for: Collagen-Coated Poly(lactide-<em>co</em>-glycolide)/Hydroxyapatite Scaffold Incorporated with DGEA Peptide for Synergistic Repair of Skull Defect
Source: Preprints.org preprint supplement (doi:10.20944/preprints201801.0149.v1), 2018-01-17
Supplement: Supplementary file 1 [file supplementary]

Article

Collagen-Coated Poly(lactide-*co*-glycolide)/Hydroxyapatite Scaffold Incorporated with DGEA Peptide for Synergistic Repair of Skull Defect

Ming Bi 1, Hui Han 2, Shujun Dong 3, Ying Zhang 4,*, Weiguo Xu 5, Bitao Zhu 5, Jingyun Wang 1, Yanmin Zhou 1,* and Jianxun Ding 5,*

1 Department of General Dentistry, School and Hospital of Stomatology, Jilin University, Changchun 130021, P. R. China; [biming11@mails.jlu.edu.cn](mailto:biming11@mails.jlu.edu.cn) (M.B.); [jlccjingyun@sina.com](mailto:jlccjingyun@sina.com) (J.W.)

2 Department of Thyroid Surgery, The First Hospital of Jilin University, Changchun 130021, P. R. China; [hh198404@hotmail.com](mailto:hh198404@hotmail.com) (H.H.)

3 VIP Integrated Department, Stomatological Hospital, Jilin University, Changchun 130021, P. R. China; [dsj@jlu.edu.cn](mailto:dsj@jlu.edu.cn) (S.D.)

4 Department of Orthopedics, Zhongshan Hospital Affiliated to Xiamen University, Xiamin 361004, People's Republic of China

5 Key Laboratory of Polymer Ecomaterials, Changchun Institute of Applied Chemistry, Chinese Academy of Sciences, Changchun 130022, P. R. China; [wgxu@ciac.ac.cn](mailto:wgxu@ciac.ac.cn) (W.X.); [btzhu@ciac.ac.cn](mailto:btzhu@ciac.ac.cn) (B.Z.)

*Correspondence: [jxding@ciac.ac.cn](mailto:jxding@ciac.ac.cn) (J.D.); [zhouym62@126.com](mailto:zhouym62@126.com) (Y.Z.); [xmzhangying@163.com](#mailto:xmzhangying@163.com) (Y.Z.)


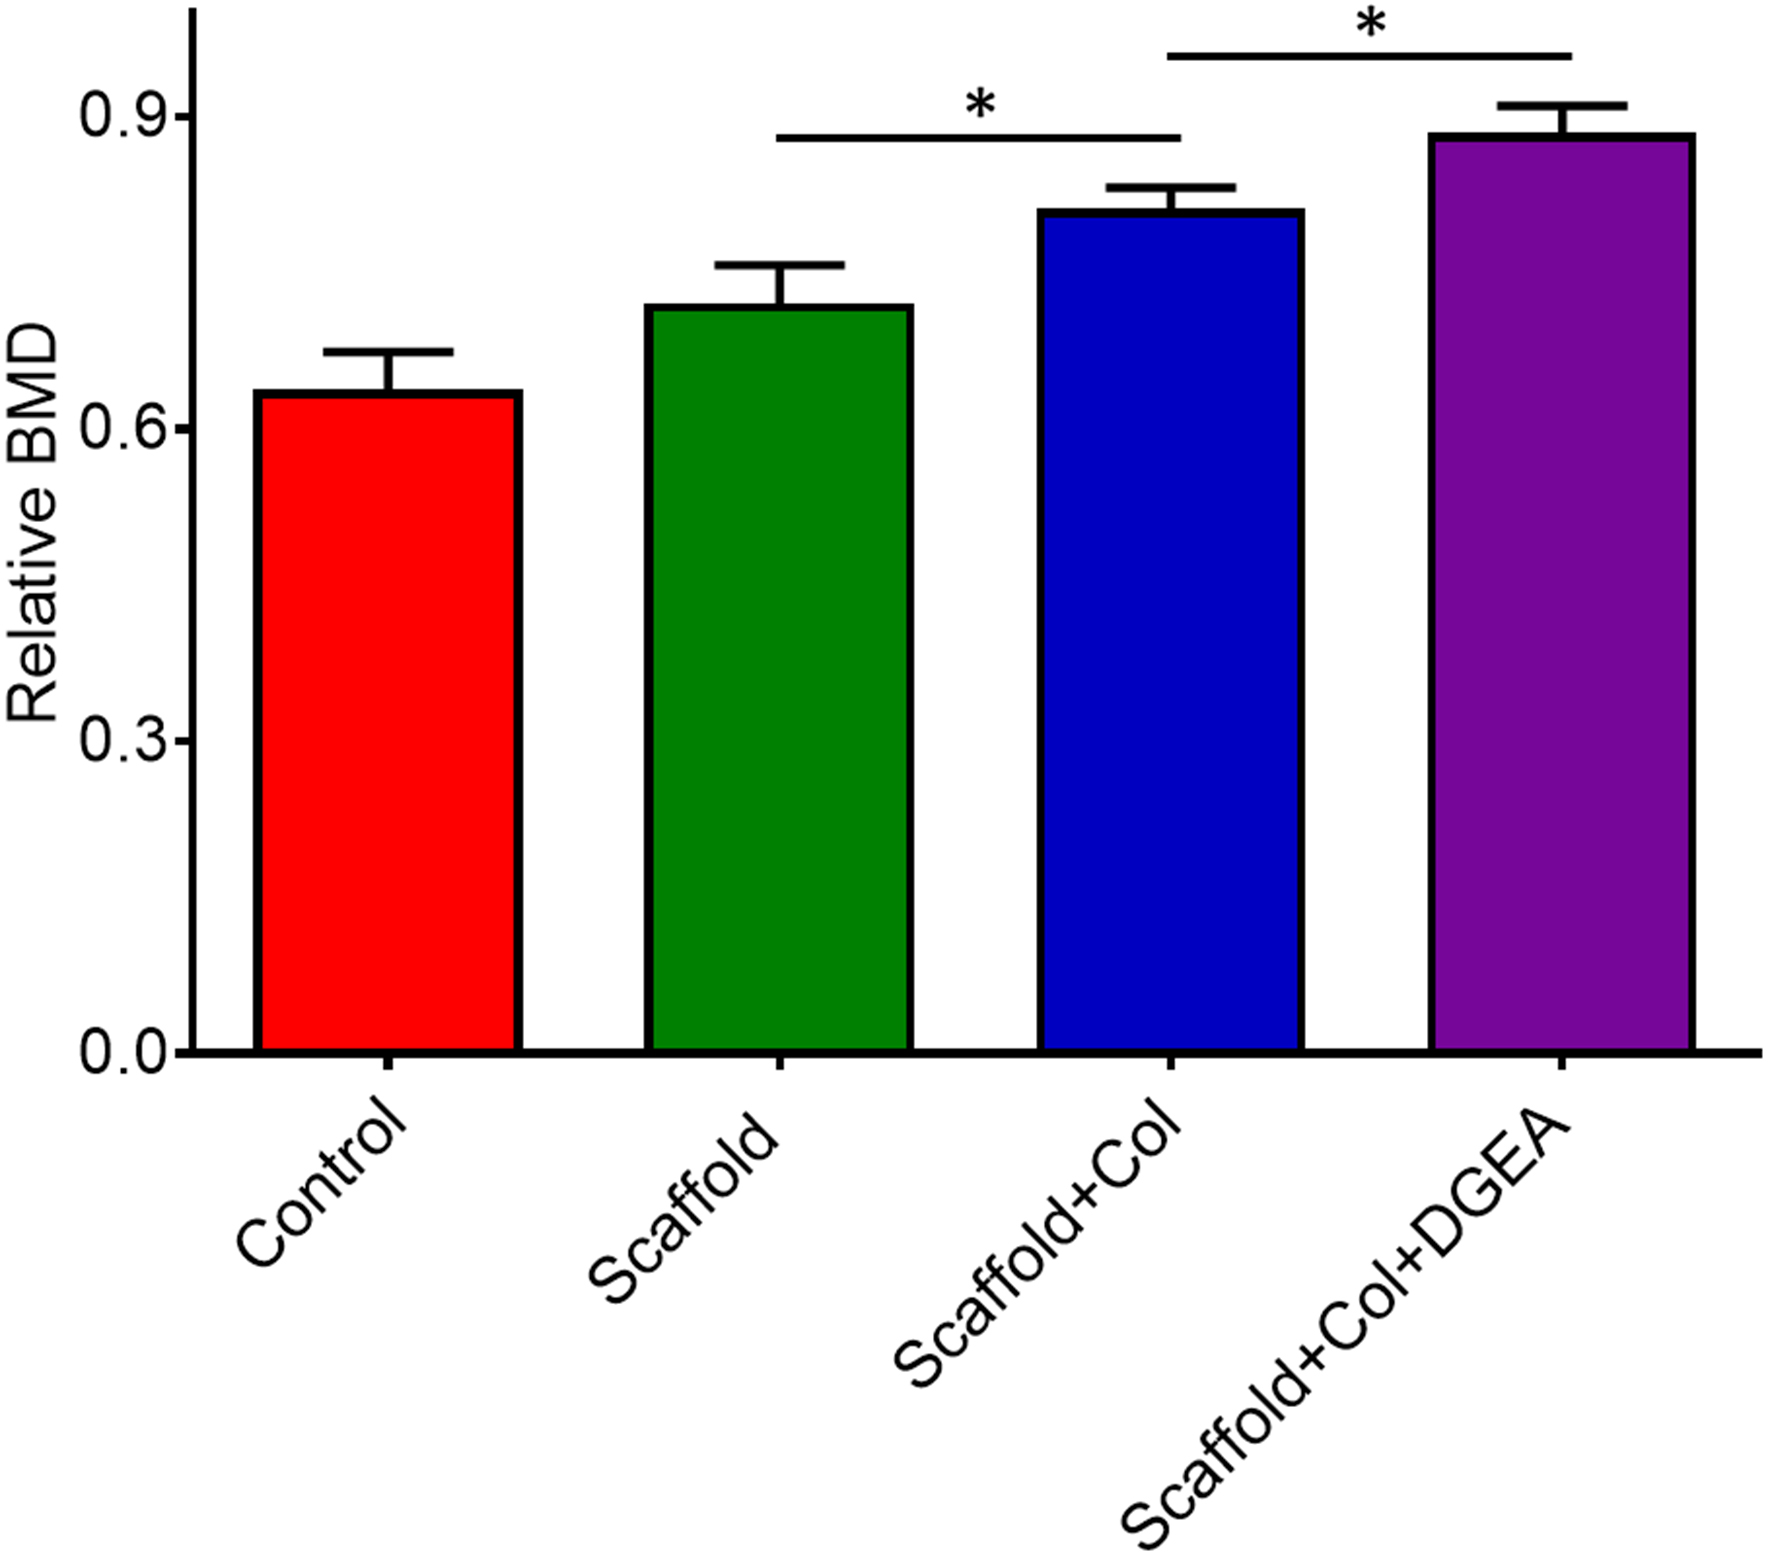


**Figure S1.** Bone mineral density (BMD) of new born tissue in defect region.


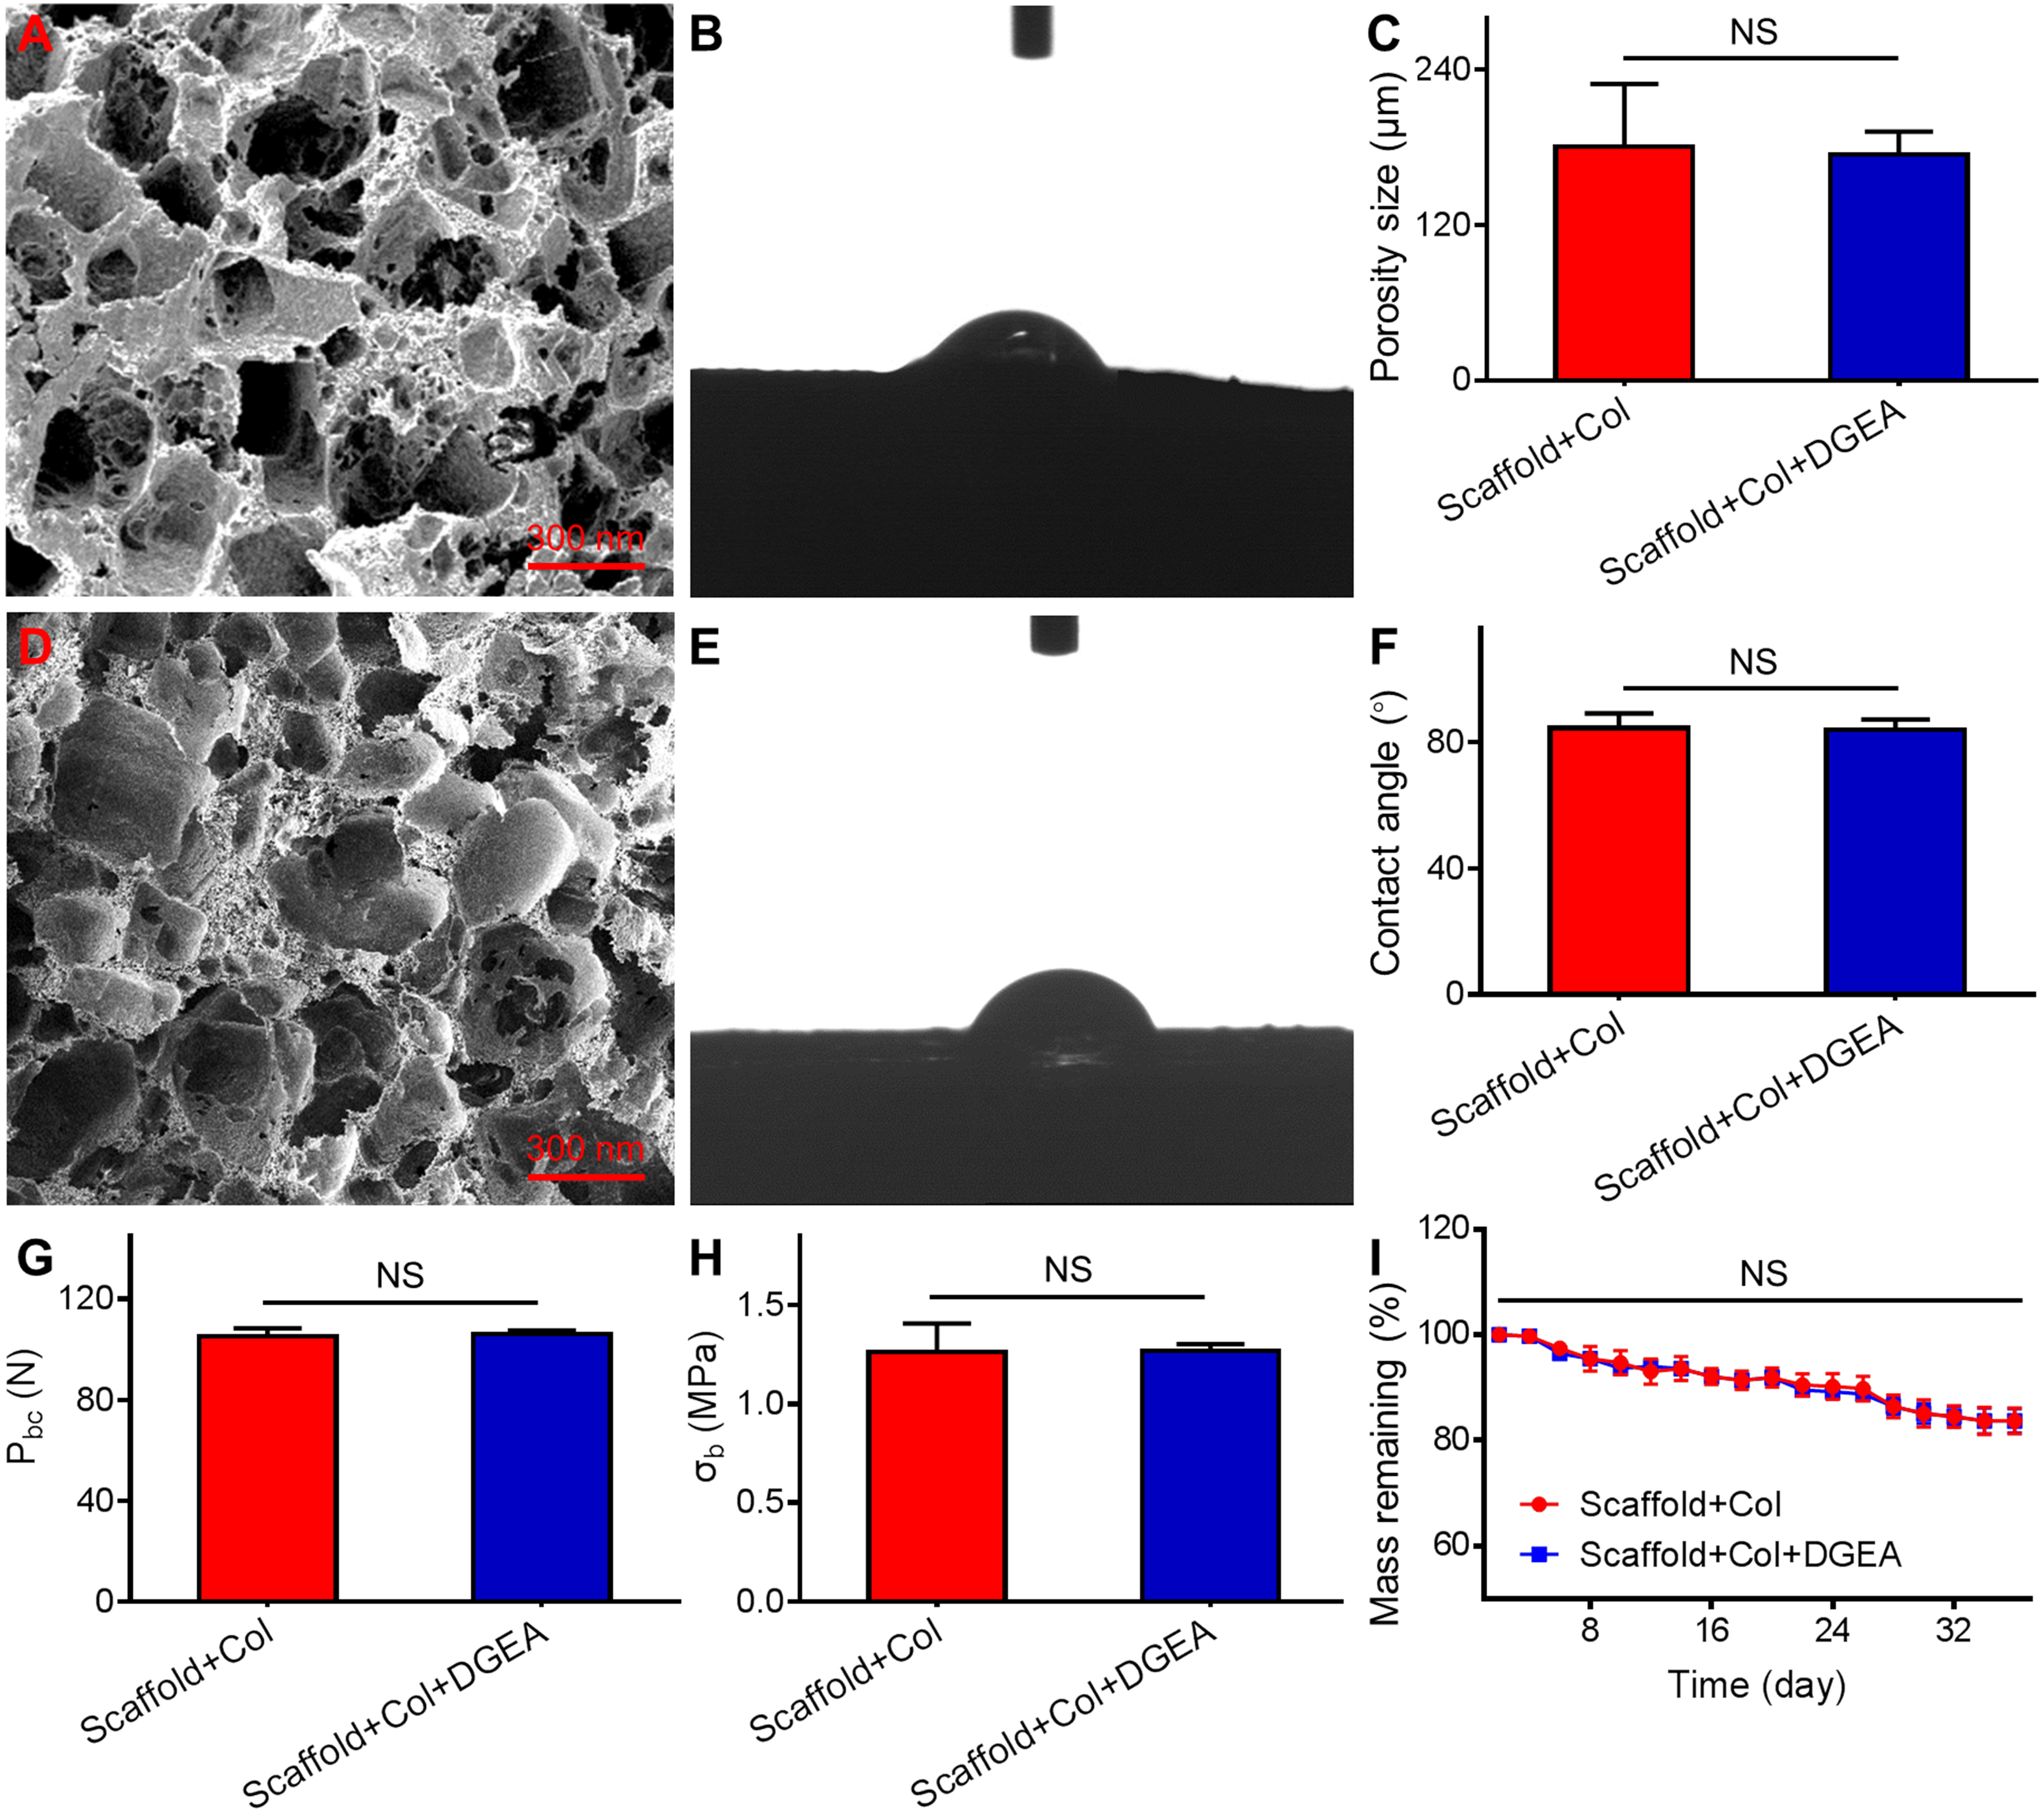


**Figure S2.** Morphologies, mechanical strength, and degradation. (A, D) Morphologies, (B, E) morphologies of contact angle measurement, (C) porosity sizes, and (F) contact angle of collagen-coated scaffold and the DGEA-collagen-coated scaffold. (G) Compressive load, (H) compressive tests, and (I) degradation rate of collagen-coated scaffold and DGEA-collagen-coated scaffold (*n* = 3, *P* = no statistical difference (NS)).
